# Supplementary material for: Genome-Wide Association Study Reveals Multiple Loci Associated with Primary Tooth Development during Infancy
Source: PubMed Central journal article supplement (PMC2829062; doi:10.1371/journal.pgen.1000856), 2010-02-26

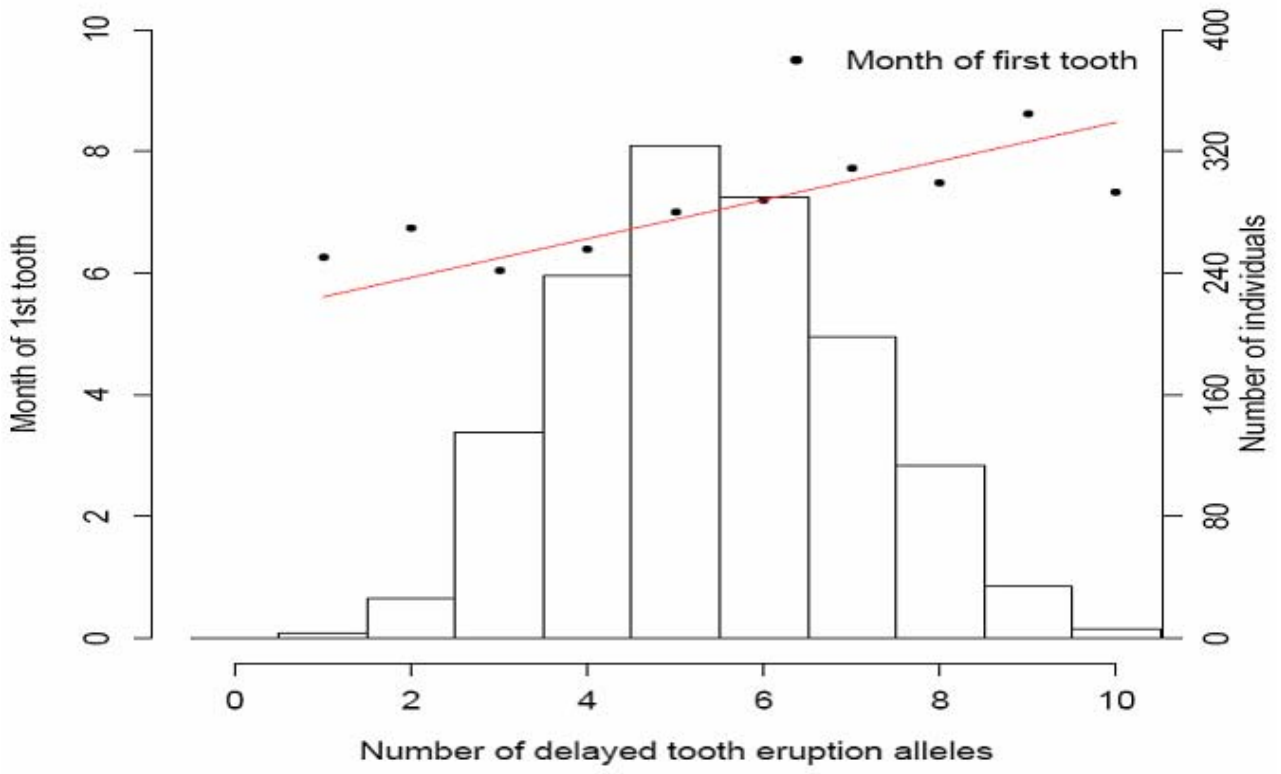

Supplement: pgen.1000856.s004.pdf [file pgen.1000856.s004.pdf]
