# Supplementary material for: Genome-Wide Association Study Reveals Multiple Loci Associated with Primary Tooth Development during Infancy
Source: PLOS journal article supplement (doi:10.1371/journal.pgen.1000856), 2010-02-26

A

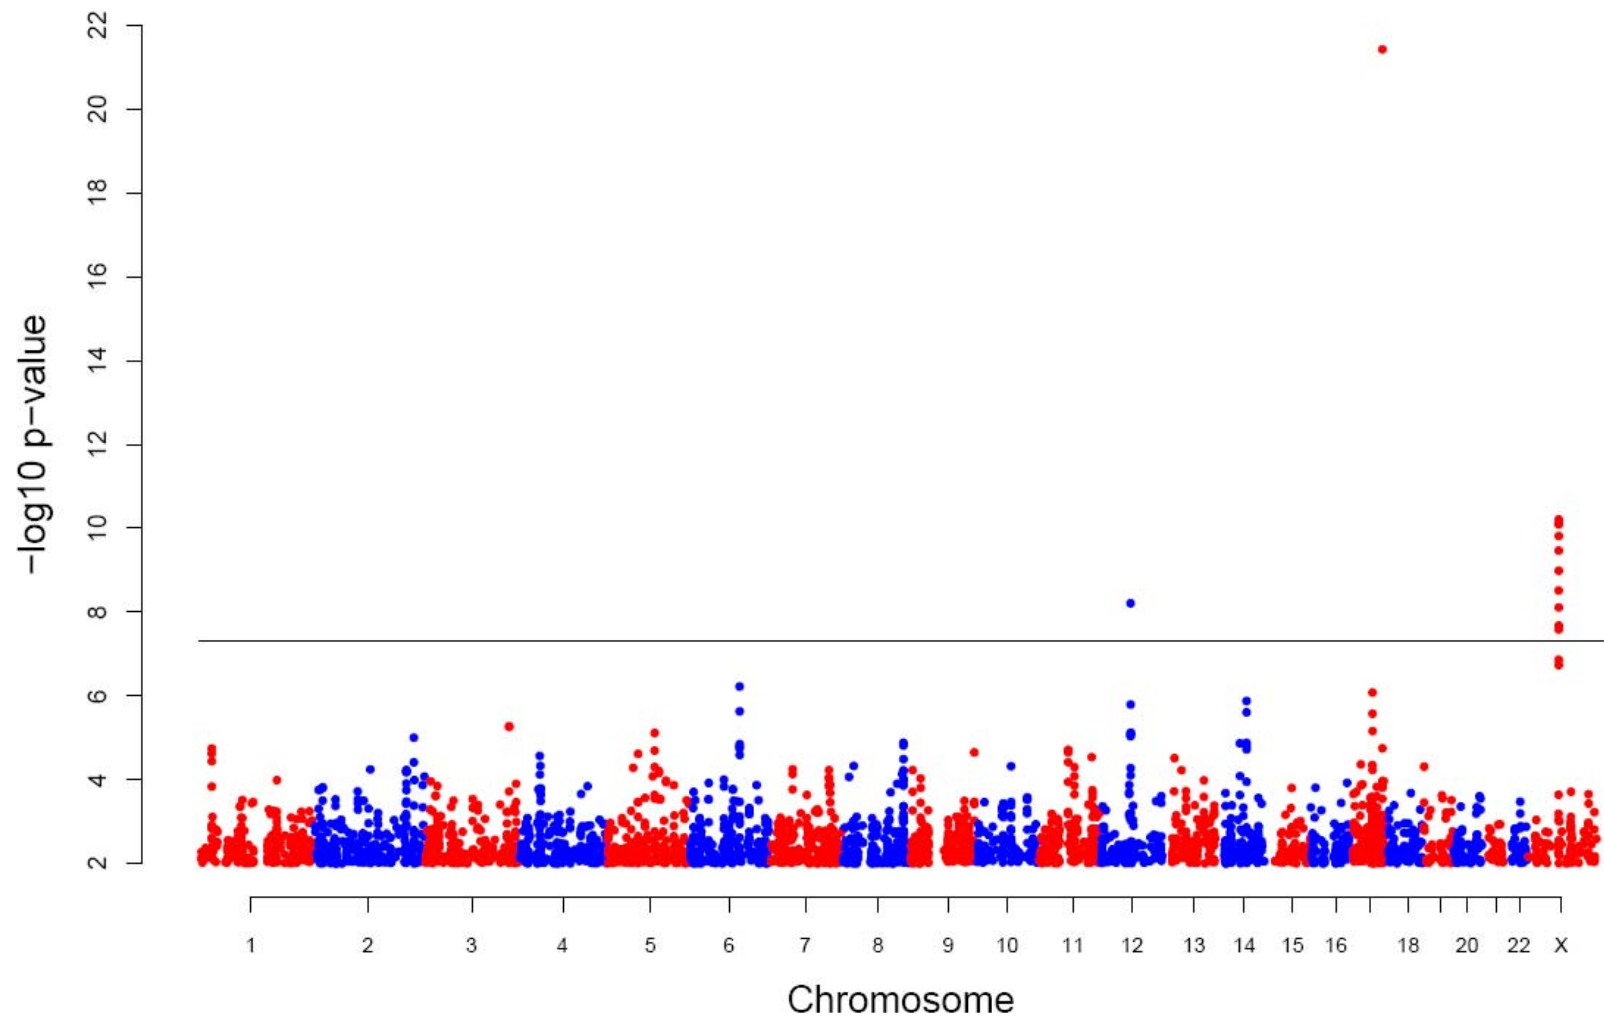

**B**

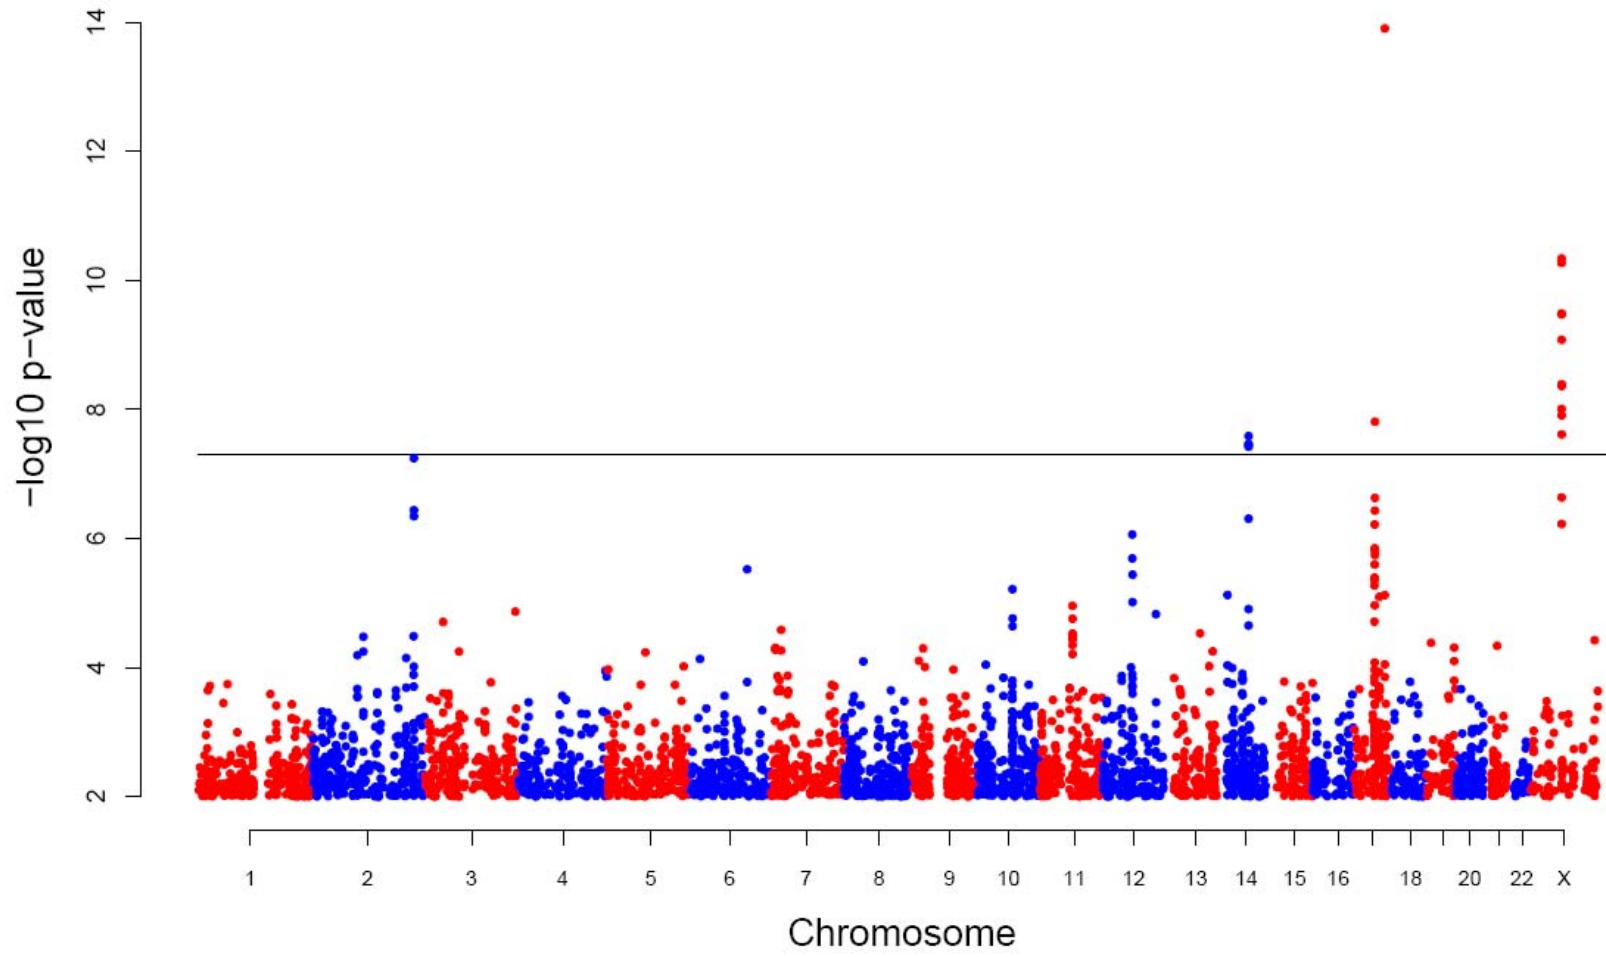

Supplement: S1 (10.1371/journal.pgen.1000856.s001) [file journal.pgen.1000856.s001]
